# Supplementary material for: High-quality permanent draft genome sequence of Rhizobium sullae strain WSM1592; a Hedysarum coronarium microsymbiont from Sassari, Italy
Source: PubMed Central journal article supplement (PMC4572446; doi:10.1186/s40793-015-0020-2), 2015-07-24
Supplement: 40793_2015_20_MOESM1_ESM.pdf [file 40793_2015_20_MOESM1_ESM.pdf]

Table S1. Associated MIGS record for WSM1592

| MIGS-ID        | Field name                                 | Description                  |
|----------------|--------------------------------------------|------------------------------|
| <b>MIGS-1</b>  | Submit to INSDC/Trace archives             |                              |
| <b>1.1</b>     | PID                                        |                              |
| <b>1.2</b>     | Trace Archive                              |                              |
| <b>MIGS-2</b>  | MIGS CHECK LIST TYPE                       |                              |
| <b>MIGS-3</b>  | Project Name                               | GEBA - Root Nodulating       |
| <b>MIGS-4</b>  | Geographic Location                        | Sardinia                     |
| <b>4.1</b>     | Latitude                                   | 40.777                       |
| <b>4.2</b>     | Longitude                                  | 8.465                        |
| <b>4.3</b>     | Depth                                      | 10-20 cm                     |
| <b>4.4</b>     | Altitude                                   | 80m                          |
| <b>MIGS-5</b>  | Time of Sample collection                  |                              |
| <b>MIGS-6</b>  | Habitat (EnvO)                             | Ottava University farm       |
| <b>6.1</b>     | Temperature                                | 28                           |
| <b>6.2</b>     | pH                                         | 5-8                          |
| <b>6.3</b>     | Salinity                                   |                              |
| <b>6.4</b>     | Chlorophyll                                |                              |
| <b>6.5</b>     | Conductivity                               |                              |
| <b>6.6</b>     | Light intensity                            |                              |
| <b>6.7</b>     | Dissolved organic carbon (DOC)             |                              |
| <b>6.8</b>     | Current                                    |                              |
| <b>6.9</b>     | Atmospheric data                           |                              |
| <b>6.10</b>    | Density                                    |                              |
| <b>6.11</b>    | Alkalinity                                 |                              |
| <b>6.12</b>    | Dissolved oxygen                           |                              |
| <b>6.13</b>    | Particulate organic carbon (POC)           |                              |
| <b>6.14</b>    | Phosphate                                  |                              |
| <b>6.15</b>    | Nitrate                                    |                              |
| <b>6.16</b>    | Sulfates                                   |                              |
| <b>6.17</b>    | Sulfides                                   |                              |
| <b>6.18</b>    | Primary production                         |                              |
| <b>MIGS-7</b>  | Subspecific genetic lineage                |                              |
| <b>MIGS-9</b>  | Number of replicons                        |                              |
| <b>MIGS-10</b> | Extrachromosomal elements                  |                              |
| <b>MIGS-11</b> | Estimated Size                             | 7.5 Mbp                      |
| <b>MIGS-12</b> | Reference for biomaterial or Genome report |                              |
| <b>MIGS-14</b> | Known Pathogenicity                        | Non-pathogen                 |
| <b>MIGS-15</b> | Biotic Relationship                        | Symbiotic                    |
| <b>MIGS-16</b> | Specific Host                              | <i>Hedysarum coronarium</i>  |
| <b>MIGS-17</b> | Host specificity or range (taxid)          |                              |
| <b>MIGS-18</b> | Health status of Host                      |                              |
| <b>MIGS-19</b> | Trophic Level                              |                              |
| <b>MIGS-22</b> | Relationship to Oxygen                     | Aerobe                       |
| <b>MIGS-23</b> | Isolation and Growth conditions            | TY medium [11], 28°C,        |
| <b>MIGS-27</b> | Nucleic acid preparation                   | CTAB                         |
| <b>28.1</b>    | Library size                               |                              |
| <b>28.2</b>    | Number of reads                            | 29,255,624                   |
| <b>28.3</b>    | Vector                                     |                              |
| <b>MIGS-29</b> | Sequencing method                          | Illumina HiSeq 2000          |
| <b>MIGS-30</b> | Assembly                                   |                              |
| <b>30.1</b>    | Assembly method                            | Velvet version 1.1.04,       |
| <b>30.2</b>    | Estimated error rate                       |                              |
| <b>30.3</b>    | Method of calculation                      |                              |
| <b>MIGS-31</b> | Finishing strategy                         |                              |
| <b>31.1</b>    | Status                                     | High-quality permanent draft |
| <b>31.2</b>    | Coverage                                   | 877x                         |
| <b>31.3</b>    | Contigs                                    | 118                          |
| <b>MIGS-32</b> | Relevant SOPs                              |                              |
| <b>MIGS-33</b> | Relevant e-resources                       |                              |
